# Supplementary material for: Controllable growth of vertically aligned heterophase TiO2 nanocones under glycerol assistance toward photocatalytic water purification
Source: Royal Society of Chemistry journal article supplement (doi:10.1039/d4ce01115e), 2025-01-01
Supplement: d4ce01115e1.pdf [file d4ce01115e1.pdf]

Supporting Information for

Controllable growth of vertically aligned heterophase TiO<sub>2</sub> nanocones  
under glycerol assisting toward photocatalytic water purification

Xiangzhuo Wang <sup>\*,a</sup>, Yun Zhao <sup>b</sup>, Xuqiang Zhang <sup>b</sup>, Yongkai Li <sup>c,d</sup>, Tinglu Song <sup>e</sup>, Renyi Li <sup>f</sup>,  
Miao Li <sup>a</sup>, Ming Xu <sup>\*,a</sup>, Junfeng Han <sup>g,h</sup>, Wende Xiao <sup>g,h</sup>

<sup>a</sup> Shaanxi University Key Laboratory of Photonic Power Devices and Discharge Regulation & Department of Applied Physics, Xi'an University of Technology, Xi'an, 710048, P. R. China.

<sup>b</sup> Key Laboratory of Atomic and Molecular Physics & Functional Materials of Gansu Province, College of Physics and Electronic Engineering, Northwest Normal University, Lanzhou, 730070, P. R. China.

<sup>c</sup> School of Optics and Photonics, Beijing Institute of Technology, Beijing 100081, P. R. China.

<sup>d</sup> Yangtze Delta Region Academy of Beijing Institute of Technology, Jiaxing 314019, P. R. China.

<sup>e</sup> Experimental Center of Advanced Materials School of Materials Science & Engineering, Beijing Institute of Technology, Beijing, 100081, P. R. China.

<sup>f</sup> School of Materials Science and Engineering, Peking University, Beijing, 100871, P. R. China.

<sup>g</sup> Centre for Quantum Physics, Key Laboratory of Advanced Optoelectronic Quantum Architecture and Measurement (MOE), School of Physics, Beijing Institute of Technology, Beijing, 100081, China.

<sup>h</sup> International Center for Quantum Materials, Beijing Institute of Technology, Zhuhai, 519000, China.

\*E-mail: wangxiangzhuo@xaut.edu.cn (X. Z. W); xuming@xaut.edu.cn (M. X.)

## Contents

Figure S1. SEM image of TNCs on Ti substrates for test of the energy-dispersive X-ray spectroscopy (EDX) spectrum.

Figure S2. XPS survey scan of as-grown TNCs samples grown on Ti substrate, which mainly include Ti and O elements.

Figure S3. Photodegradation kinetic curves and photodegradation rates of MO by TDFs and TNCs under simulated sunlight irradiation.

Figure S4. Morphology evolution of TNCs depending on the growth times.

Figure S5. Determination of heterophase components of t-TNCs on Ti substrates by using XRD characterization.

Figure S6. Photodegradation kinetic curves of MO by t-TNCs under simulated sunlight irradiation.

Figure S7. Photodegradation rates of MO by t-TNCs under simulated sunlight irradiation.

## Figure captions

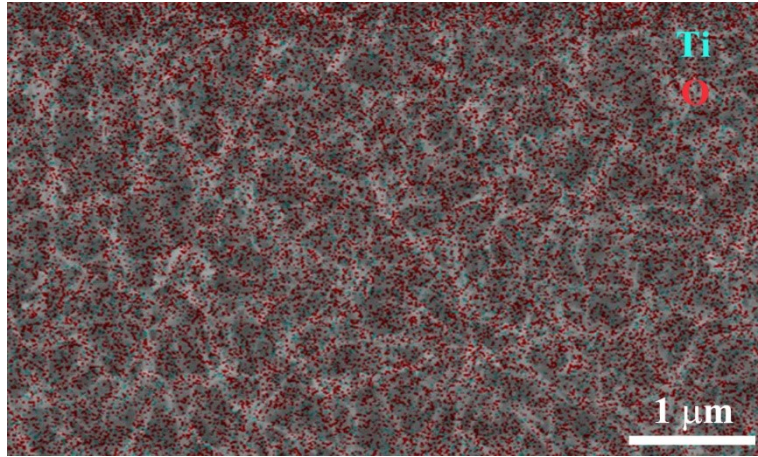

**Figure S1.** SEM image of TNCs on Ti substrates for test of the energy-dispersive X-ray spectroscopy (EDX) spectrum. The compositional uniformity of Ti and O elements from TNCs was confirmed by the uniform color contrasts.

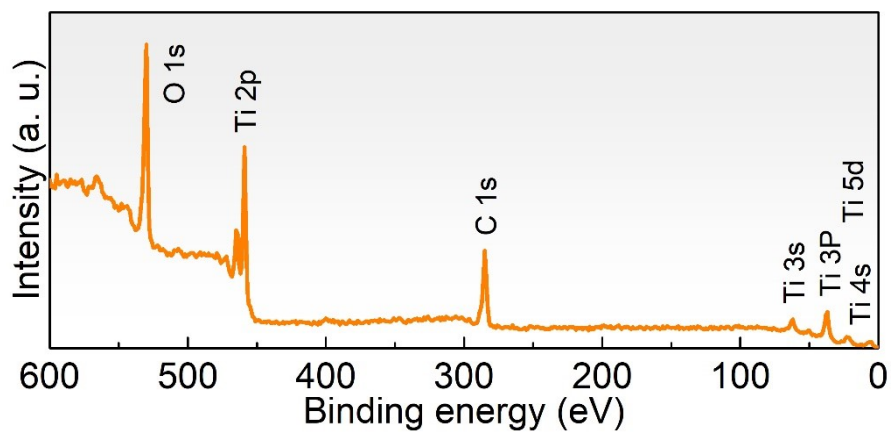

**Figure S2.** XPS survey scan of as-grown TNCs samples grown on Ti substrate. The chemical components of as-grown TNCs samples were confirmed by using the XPS analysis data. The atomic ratio of Ti and O elements is  $\sim 1:2$ , revealing the stoichiometric ratio of glycerol-assisted hydrothermal-grown  $\text{TiO}_2$ .

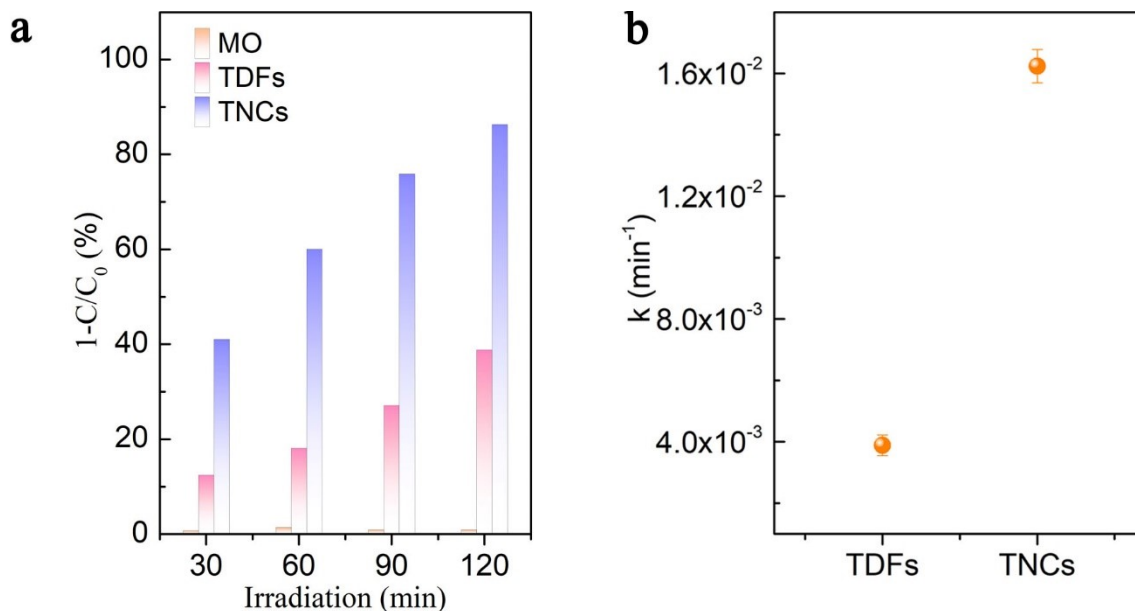

**Figure S3.** Photodegradation kinetic curves and photodegradation rates of MO by TDFs and TNCs. a) Photodegradation efficiency of MO by TDFs and TNCs under simulated sunlight irradiation, revealing nanocone structure can significantly improve the photocatalytic efficiency. b) Photodegradation rates of the TDFs and TNCs. The TNCs ( $K = 0.01624 \text{ min}^{-1}$ ) show a more rapid photodegradation process compared to TDFs ( $K = 0.00389 \text{ min}^{-1}$ ).

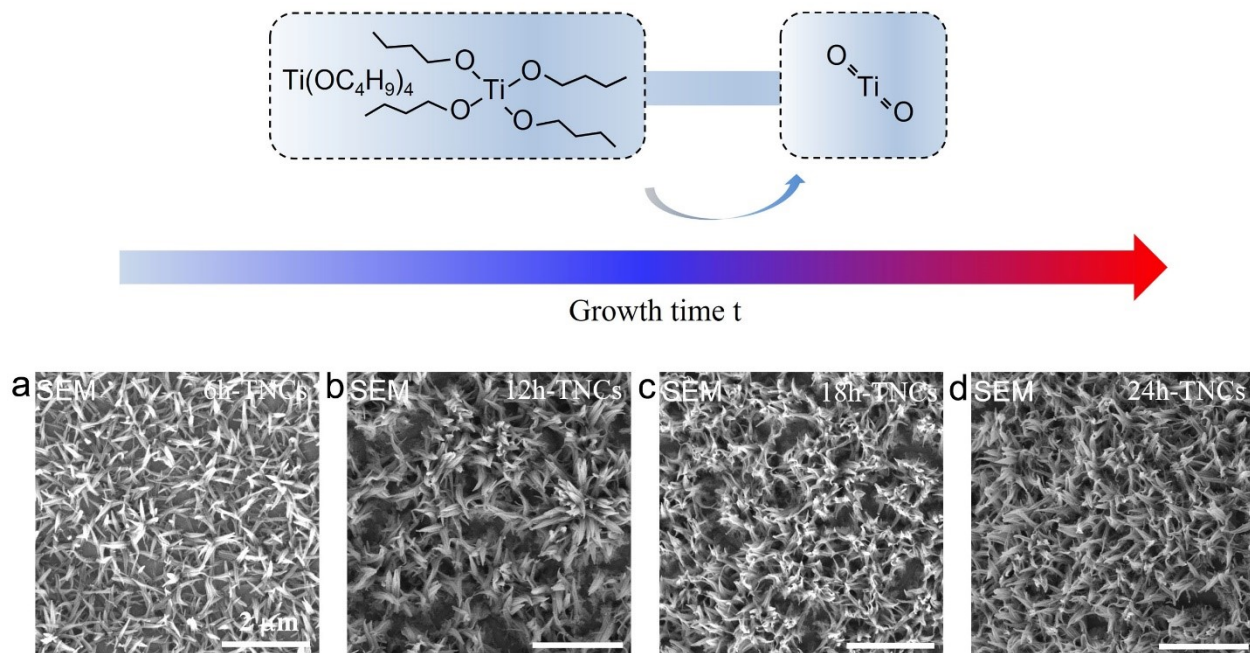

**Figure S4.** Morphology evolution of TNCs depending on the growth time. (a-d) The low magnification of top-view SEM images of t-TNCs grown on Ti substrate ( $t = 6$  h, 12 h, 18 h, 24 h), revealing the uniform distribution of the samples.

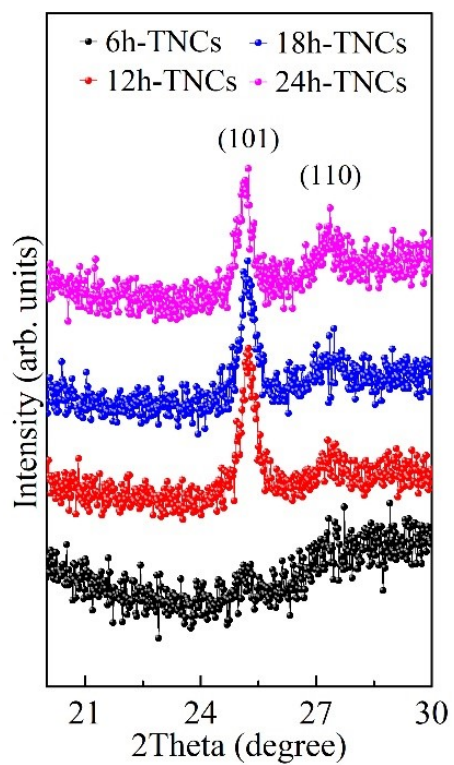

**Figure S5.** Determination of heterophase components of t-TNCs on Ti substrates by using XRD characterization, confirming that the heterophase is composed of TiO<sub>2</sub> anatase phase and rutile phase.



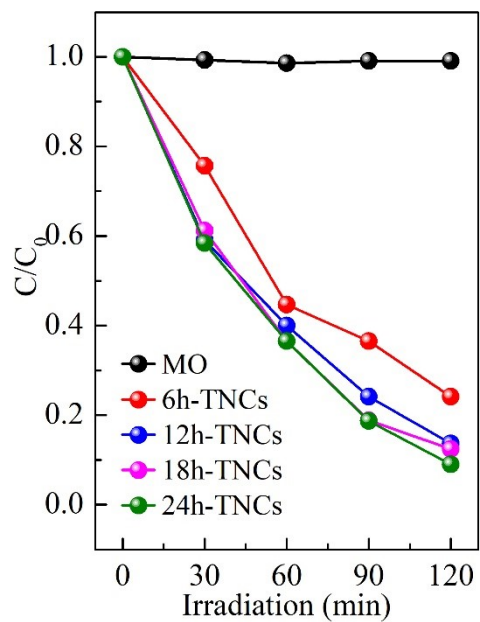

**Figure S6.** Photodegradation kinetic curves of MO by t-TNCs under simulated sunlight irradiation, the  $C_0$  and  $C$  are the initial and reaction concentrations of the MO aqueous solution, respectively.

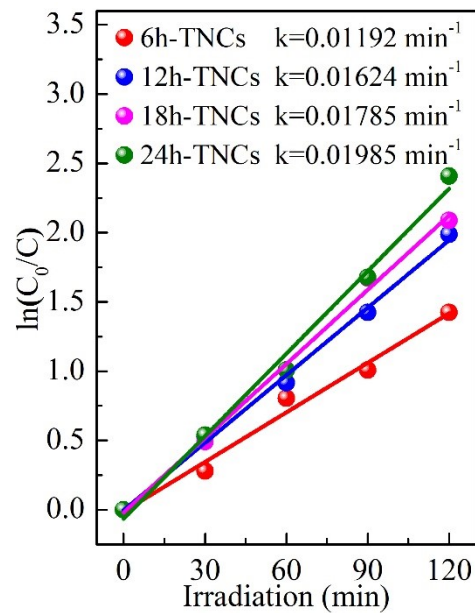

**Figure S7.** Photodegradation rates of MO by t-TNCs under simulated sunlight irradiation, the  $C_0$  and  $C$  are the initial and reaction concentrations of the MO aqueous solution, respectively,  $K$  is the rate constant.
